# Supplementary material for: Comparative Genome-wide Analysis and Expression Profiling of Histone Acetyltransferases and Histone Deacetylases Involved in the Response to Drought in Wheat
Source: Research Square preprint supplement (doi:10.21203/rs.3.rs-123885/v1), 2020-12-15
Supplement: Supplementary file 1 [file 876175f0d75121a722f2769f.xlsx]

## Sheet: Sheet1
Additional file 3 of Comparative Genome-wide Analysis and Expression Profiling of Histone Acetyltransferases and Histone Deacetylases Involved in the Response to Drought in Wheat (Hua Li, Huajie Liu, Xinxin Pei, Hongyu Chen, Xiao Li, Jiarui Wang, Chenyang Wang)
Table S2 Identification of putative cis-regulatory elements in the TaHATs promoters
HAT families	Gene Name	Accession No.	Strand
				TGA-element	I-box	G-Box	O2-site	ABRE	CCGTCC-box	W box	as-1	AT~TATA-box	ATCT-motif	TC-rich repeats	TCA	LTR	G-box	ARE	CGTCA-motif	CAT-box	WRE3	TGACG-motif	STRE	MYB recognition site	MRE	MYB	CCAAT-box	TCCC-motif	A-box	Myb-binding site	ERE	MYC	AAGAA-motif	Box4	GC-motif	TCT-motif	MBS	MYB-like sequence	ABRE3a	ABRE4	GTGGC-motif	TCA-element	GT1-motif	AE-box	DRE core	WUN-motif	CCGTCC motif	Sp1	ABRE2
GNAT	TaHAG1A	TraesCS1A02G138200	+	1176;	34;			196;379;	727;750;		158;222;377;392;415;794;871;	1124;		1234;		472;	126;378;715;	949;	158;222;377;392;415;794;871;	240;	51;143;249;257;	158;222;377;392;415;794;871;	862;887;892;1477	189;1300;	1089	15;48;551;	189;1300;	855;	727;750;	551;		784;													177;		727;750;	839;
	TaHAG1D	TraesCS1D02G134200	-	1230;	978;	296;894;	243;1161	297;895;937;	1332;	189;	280;349;935;1031;	572;1176;	156;	145;	761;	462;	21;302;936;	52;124;328;	280;349;935;1031;1332;			280;349;935;1031;	976;1477;						1332;			774;1002;
	TaHAG1U	TraesCSU02G003200	+	1;	312;	894;		894;895;			527;						894;	15;1350;	527;			527;	1477;	491;		464;916;944;	491;			464;	1170;	844;	281;				900；								1117;
	TaHAG2A	TraesCS5A02G197700	-	371;				876;1134;					32;		220;	1436;	427;1133;1218;	803;		1281;			1233;1241;1246;1328;1397;1452;	1252;	361;1108;	314;380;572;	1252;			572;		206;	158;981;1158;		1461;			314;	1133;	1133;		1195;
	TaHAG2B	TraesCS5B02G186000	+	1349;			403;	437;454;907;			166;	627;		705;		854;	436;906;	649;1162;	166;	1266;		166;	301;1099;1219;1227;1232;1328;1396;1452;	757;	495;	1280;	757;	1070;			1050;	22;1005;	1282;		1467;			1280;	436;906;	436;906;	613;	1181;	1281;			769;		352;
	TaHAG2D	TraesCS5D02G193200	+	426;		410；		410;1186;1358;		239;		617;			282;		1186;1357;	748;789;			792;		1191;1243;1331;1397;1452;	74;		564;739;	74;			564;	1128;	156;692;1074;	448;1208;1293;	386;	1461;	21;458;		739;
	TaHAG3A	TraesCS2A02G320900	+					1110;1338;	1186;1355;	741;	1076;1371;					1485;	1110;1337;	69;308;	1076;1371;		102;	1076;1371;		637;		287;637;			1186;1355;	637;		655;		1344;								429;		632;	924;1089;	220;539;		1384;
	TaHAG3B	TraesCS2B02G361800	-			1337;		1105;1337;1338;	1181;1355;		1371;						1105;1332;1337;		1371;			1371;	1245;			381;629;735;			1181;1355	629;		242;650;	453;	121;1344;		492;		735;					736;	189;	919;1084;	457;	1181;1355;	1351;1384;
	TaHAG3D	TraesCS2D02G341600	+			1338;		1105;1338;1339;	1181;1356;							1485;	1105;1336;1338;							757;	45;	455;627;	757;		1181;1356;	627;	99;	316;588;645;	527;	196;										622;	919;1084;	531;	1181;1356;	321;1385;	1337;
MYST	TaHAG4A	TraesCS2A02G159700	+			838;		839;	441；		1183;1234;	590;1131;						104;	1183;1234;			1183;1234;	1209;						441；		391；	173;614;729;946;968;1061;	153;			1362;										1079;	441;	1264;1293;1449;1459;
	TaHAG4B	TraesCS2B02G185300	+						630;773;		69;77;	1103;						508;	69;77;		85;	69;77;	169;334;	277;		97;	277;		630;773;		616;1129;	262;862;960;984;1139;	473;675;	1213;	1471;	153;1270;1494;										637;1182;1228;1229;	630;773;	1394;1423;
	TaHAG4D	TraesCS2D02G166900	+			793;917;		794;917;918;			326;1231;	135;					917;		326;1231;			326;1231;				405;				405;	464;1011;	427;664;758;939;1030;		1050;	399;1338;	1361;												356;385;478;1261;1290;1448;1448;1458;
CBP	TaHAC1A	TraesCS3A02G524800	+		959;	789;		1207;	219;347;		233;1184;	886;					622;1206;	38;1105;1189;	233;1184;	828;		233;1184;	570;			54;1089;1226;1228;1314;1436;			219;347;	54;	799;	791;1403;1473;			344;562;578;596;605;			1089;1238;	1206;	1206;			1088;		905;		219;347;	486;565;592;599;
	TaHAC1B	TraesCS3B02G592100	+					1188;	216;220;341;								543;1187;	1099;		753;			129;1022;1383;			923;949;968;1148;1197;1207;1220;1292;1434;1455;		987;	216;220;341;	1197;1455;		73;723;1370;1401;1425;1473;	1084;	18;743;	338;	143;1078;		923;949;968;1148;1220;	1187;	1187;			922;	942;			216;220;341;
	TaHAC1D	TraesCS3D02G530000	+	45;1194;			259；	8;76;1198;	401;529;		118;						7;75;1196;1197;		118;	1025;		118;	751;			88;1185;1210;1222;1268;1294;1434;			401;529;	88;1268;		995;1053;1401;1473;	909;	1016;	526;744;759;777;784;788;			1185;1222;	7;	7			1184;				401;529;	340;678;747;773;780;
	TaHAC2A	TraesCS2A02G039500	-		1258;1423;				560;681;		401;765;	354;356;358;360;		994;		788;	852;	791;1046;1238;	401;765;	1130;		401;765;	450;671;714;719;732;			1188;1304;1436;		1119;	560;681;			156;309;1405;	1178;	1390;	661;724;	998;	395;1184;	1188;					1189;
	TaHAC2B	TraesCS2B02G052300	-			83;	1041;	83;			120;445;			970;			234;807;	1157;	120;445;		1096;	120;445;	737;785;798;			976;1290;			627;747;999;			26;1403;	327;	431;1364;	790;		167;439;	976;							258;		627;747;999;
	TaHAC2D	TraesCS2D02G038100	-		1242;1243;	206;		206;207;749;		176;	376;766;	330;332;334;336;338;		880;		789;	206;	792;1048;1214;1222;1384;	376;766;	1121;		376;766;	428;704;709;722;			531;1288;			550;671;			143;286;1274;1405;	1169;	1366;	714;		370;					394;					550;671;
	TaHAC4A	TraesCS7A02G414500	+				471;	1068;1104;1185;		440;1180;1477;	331;	1383;						244;	331;		684;	331;	768;782;829;869;1126;	608;		1457;	608;	1261;	750;1350;			38;516;1277;1321;1485;	261;528;		876;1143;									531;			750;1350;	838;842;861;865;
	TaHAC4B	TraesCS7B02G314400	+		272;		457;	1058;1177;	422;734;1336;	426;1172;	1464;							253;	1464;		487;668;	1464;	753;766;817;857;1116;	590;			590;		422;734;1336;		33;	547;1307;	270;514;		864;1133;	305;								517;				826;830;849;853;
	TaHAC4D	TraesCS7D02G407600	+					1048;1165;	730;1334;	421;1160;1477;		1367;					1192;			535;	664;		95;749;762;809;849;1106;	589;		1391;1457;	589;	1245;	730;1334;	1391;	457；	181;542;1305;1485;	245;509;		856;1123;									512;				818;822;841;845;1138;
	TaHAC5A	TraesCS6A02G107300	+			687;	844;	387;551;687;688;1440;	1002;1009;1220;		1458;		36;465;			461;1159;	294;387;551;687;		1458;			1458;	126;265;622;641;954;983;1120;1409;			518;1323;		155;	1002;1009;1220;			600;	1421;		583;1006;1013;1038;			1323;					1324;		1131;		1002;1009;1220;	251;432;853;893;1049;1075;1140;1163;1224;
	TaHAC5B	TraesCS6B02G135800	+			669;	822;	669;670;1441;			1458;		4；			1126;	669;		1458;	531;1410;		1458;	97;603;622;944;1087;			500;1325;					474;	333;	1422;		865;973;996;1036;1133;			1325;					1326;		840;			416;883;1007;1033;1107;1130;1190;1399;1467;
	TaHAC5D	TraesCS6D02G095400	+			141;589;642;908;	181;	141;396;589;643;908;909;	656;953;1171;		771;1458;		248;			1110;	65;395;908;		771;1458;		1313;	771;1458;	36;339;844;863;1071;1405;			154;737;1316;		368;881;	656;953;1171;		711;	120;823;	1417;		465;806;934;980;1020;			1316;	395;	395;			1317;				656;953;1171;	991;1017;1114;1175;
TAFII250	TaHAF1A	TraesCS7A02G515000	+			241;			106;276;		505;631;1088;1220;					1013;		737;	505;631;1088;1220;			505;631;1088;1220;	185;			723;1289;1299;		171;	106;276;			772;	890;	902;	484;			723;1289;									106;276;	230;1435;
	TaHAF1B	TraesCS7B02G431700	+	19;		1042;			1475;	945;		1161;1163;	824;868;	760;1035;		628;	270;	566;596;758;1211;					260;338;1024;1106;1394;1429;1447;	381;					1475;			102;	483;501;603;											639;			1475;
	TaHAF1D	TraesCS7D02G505400	+			747;		748;		652;	72;	1161;1163;1165;	577;	513;740;		381;	9;	122;287;317;349;511;1094;	72;		119;	72;	64;729;811;1394;1429;1447;	142;	1155;	981;					735;	985;	243;261;300;					981;					980;	392;
	TaHAF2A	TraesCS7A02G514800	+				340;	1387;			216;		952;			1096;	1387;		216;		420;1172;1306;	216;	1269;1290;1317;1336;			308;552;		1274;		552;	902;	394;451;		407;532;	1283;	543;	317;	308;	1387;	1387;						768;		1301;1314;
	TaHAF2B	TraesCS7B02G431500	+	567;		131;			1248;		227;453;498;612;828;	617;			460;	929;	193;1383;		227;453;498;612;828;		1155;1289;	227;453;498;612;828;	67;280;1252;1273;1312;1331;1375;	200;			200;	1257;	1248;						11;877;893;1245;1351;1393;												1248;	101;371;704;1284;1309;1454;
	TaHAF2D	TraesCS7D02G505200	+	546;1002;				1382;	47;1257;	184;191;784;	809;	389;391;393;720;				1084;	1382;	172;	809;		261;1298;	809;	746;1261;1282;1312;1331;1374;			582;		1266;	47;1257;		462;848;	286;	773;		1254;1275;1392;1483;							832;				770;	47;1257;	1293;1309;
[truncated: 7 more columns]
